# Supplementary material for: Developing a global operational seasonal hydro-meteorological forecasting system: GloFAS-Seasonal v1.0
Source: Copernicus journal article supplement (doi:10.5194/gmd-11-3327-2018), 2018-08-21
Supplement: Supplementary file 2 [file gmd-11-3327-2018-supplement.zip]

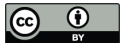

## *Supplement of*

# **Developing a global operational seasonal hydro-meteorological forecasting system: GloFAS-Seasonal v1.0**

**Rebecca Emerton et al.**

*Correspondence to:* Rebecca Emerton ([r.e.emerton@pgr.reading.ac.uk](mailto:r.e.emerton@pgr.reading.ac.uk))

- [gmd-11-3327-2018-supplement-title-page.pdf](#)
- [Supplementary\\_Figures.pdf](#)
- [fcprod1\\_compute\\_weekly\\_averages\\_gridded.sh](#)
- [fcprod2\\_compute\\_exceedance\\_probabilities.py](#)
- [fcprod3\\_compute\\_max\\_probabilities\\_gridded.py](#)
- [fcprod4\\_compute\\_basin\\_averaged\\_exceedance\\_probabilities.py](#)
- [fcprod5\\_compute\\_basin\\_averaged\\_max\\_probabilities.py](#)
- [fcprod6\\_basin\\_overview\\_map.py](#)
- [fcprod7\\_river\\_network\\_map.r](#)
- [fcprod8\\_hydrograph.py](#)
- [gdal\\_calc.py](#)

The copyright of individual parts of the supplement might differ from the CC BY 4.0 License.
